# Supplementary material
Source: publisher site journal article supplement (https://www.spandidos-publications.com/6954/downloadSupplementary)
Supplement: Supplementary file 1 [file downloadSupplementary]

## Sheet: 259 FRGs
Table SI. Ferroptosis-related genes
Gene set	Gene Symbol
Ferroptosis-Related Gene	SLC7A11
Ferroptosis-Related Gene	GPX4
Ferroptosis-Related Gene	AKR1C1
Ferroptosis-Related Gene	AKR1C2
Ferroptosis-Related Gene	AKR1C3
Ferroptosis-Related Gene	RB1
Ferroptosis-Related Gene	HSPB1
Ferroptosis-Related Gene	HSF1
Ferroptosis-Related Gene	GCLC
Ferroptosis-Related Gene	NFE2L2
Ferroptosis-Related Gene	SQSTM1
Ferroptosis-Related Gene	NQO1
Ferroptosis-Related Gene	HMOX1
Ferroptosis-Related Gene	FTH1
Ferroptosis-Related Gene	MUC1
Ferroptosis-Related Gene	SLC3A2
Ferroptosis-Related Gene	MT1G
Ferroptosis-Related Gene	SLC40A1
Ferroptosis-Related Gene	CISD1
Ferroptosis-Related Gene	FANCD2
Ferroptosis-Related Gene	FTMT
Ferroptosis-Related Gene	HSPA5
Ferroptosis-Related Gene	ATF4
Ferroptosis-Related Gene	TP53
Ferroptosis-Related Gene	HELLS
Ferroptosis-Related Gene	SCD
Ferroptosis-Related Gene	FADS2
Ferroptosis-Related Gene	SRC
Ferroptosis-Related Gene	STAT3
Ferroptosis-Related Gene	PML
Ferroptosis-Related Gene	MTOR
Ferroptosis-Related Gene	NFS1
Ferroptosis-Related Gene	TP63
Ferroptosis-Related Gene	CDKN1A
Ferroptosis-Related Gene	MIR137
Ferroptosis-Related Gene	ENPP2
Ferroptosis-Related Gene	VDAC2
Ferroptosis-Related Gene	FH
Ferroptosis-Related Gene	CISD2
Ferroptosis-Related Gene	MIR9-1
Ferroptosis-Related Gene	MIR9-2
Ferroptosis-Related Gene	MIR9-3
Ferroptosis-Related Gene	CBS
Ferroptosis-Related Gene	ISCU
Ferroptosis-Related Gene	ACSL3
Ferroptosis-Related Gene	OTUB1
Ferroptosis-Related Gene	CD44
Ferroptosis-Related Gene	LINC00336
Ferroptosis-Related Gene	BRD4
Ferroptosis-Related Gene	PRDX6
Ferroptosis-Related Gene	MIR17
Ferroptosis-Related Gene	SESN2
Ferroptosis-Related Gene	NF2
Ferroptosis-Related Gene	ARNTL
Ferroptosis-Related Gene	HIF1A
Ferroptosis-Related Gene	JUN
Ferroptosis-Related Gene	CA9
Ferroptosis-Related Gene	TMBIM4
Ferroptosis-Related Gene	PLIN2
Ferroptosis-Related Gene	MIR212
Ferroptosis-Related Gene	Fer1HCH
Ferroptosis-Related Gene	AIFM2
Ferroptosis-Related Gene	LAMP2
Ferroptosis-Related Gene	ZFP36
Ferroptosis-Related Gene	PROM2
Ferroptosis-Related Gene	CHMP5
Ferroptosis-Related Gene	CHMP6
Ferroptosis-Related Gene	CAV1
Ferroptosis-Related Gene	GCH1
Ferroptosis-Related Gene	RPL8
Ferroptosis-Related Gene	IREB2
Ferroptosis-Related Gene	ATP5MC3
Ferroptosis-Related Gene	CS
Ferroptosis-Related Gene	EMC2
Ferroptosis-Related Gene	ACSF2
Ferroptosis-Related Gene	NOX1
Ferroptosis-Related Gene	CYBB
Ferroptosis-Related Gene	NOX3
Ferroptosis-Related Gene	NOX4
Ferroptosis-Related Gene	NOX5
Ferroptosis-Related Gene	DUOX1
Ferroptosis-Related Gene	DUOX2
Ferroptosis-Related Gene	G6PD
Ferroptosis-Related Gene	PGD
Ferroptosis-Related Gene	PIK3CA
Ferroptosis-Related Gene	FLT3
Ferroptosis-Related Gene	SCP2
Ferroptosis-Related Gene	ACSL4
Ferroptosis-Related Gene	LPCAT3
Ferroptosis-Related Gene	NRAS
Ferroptosis-Related Gene	KRAS
Ferroptosis-Related Gene	HRAS
Ferroptosis-Related Gene	TF
Ferroptosis-Related Gene	TFRC
Ferroptosis-Related Gene	TFR2
Ferroptosis-Related Gene	SLC38A1
Ferroptosis-Related Gene	SLC1A5
Ferroptosis-Related Gene	GLS2
Ferroptosis-Related Gene	GOT1
Ferroptosis-Related Gene	CARS1
Ferroptosis-Related Gene	ALOX5
Ferroptosis-Related Gene	KEAP1
Ferroptosis-Related Gene	ATG5
Ferroptosis-Related Gene	ATG7
Ferroptosis-Related Gene	NCOA4
Ferroptosis-Related Gene	ALOX12
Ferroptosis-Related Gene	ALOX12B
Ferroptosis-Related Gene	ALOX15
Ferroptosis-Related Gene	ALOX15B
Ferroptosis-Related Gene	ALOXE3
Ferroptosis-Related Gene	PHKG2
Ferroptosis-Related Gene	ACO1
Ferroptosis-Related Gene	G6PDX
Ferroptosis-Related Gene	ULK1
Ferroptosis-Related Gene	ATG3
Ferroptosis-Related Gene	ATG4D
Ferroptosis-Related Gene	BECN1
Ferroptosis-Related Gene	MAP1LC3A
Ferroptosis-Related Gene	GABARAPL2
Ferroptosis-Related Gene	GABARAPL1
Ferroptosis-Related Gene	ATG16L1
Ferroptosis-Related Gene	WIPI1
Ferroptosis-Related Gene	WIPI2
Ferroptosis-Related Gene	SNX4
Ferroptosis-Related Gene	ATG13
Ferroptosis-Related Gene	ULK2
Ferroptosis-Related Gene	SAT1
Ferroptosis-Related Gene	EGFR
Ferroptosis-Related Gene	MAPK3
Ferroptosis-Related Gene	MAPK1
Ferroptosis-Related Gene	BID
Ferroptosis-Related Gene	ZEB1
Ferroptosis-Related Gene	DPP4
Ferroptosis-Related Gene	CDKN2A
Ferroptosis-Related Gene	PEBP1
Ferroptosis-Related Gene	SOCS1
Ferroptosis-Related Gene	CDO1
Ferroptosis-Related Gene	MYB
Ferroptosis-Related Gene	MAPK8
Ferroptosis-Related Gene	MAPK9
Ferroptosis-Related Gene	CHAC1
Ferroptosis-Related Gene	MAPK14
Ferroptosis-Related Gene	LINC00472
Ferroptosis-Related Gene	PRKAA2
Ferroptosis-Related Gene	PRKAA1
Ferroptosis-Related Gene	ELAVL1
Ferroptosis-Related Gene	BAP1
Ferroptosis-Related Gene	ABCC1
Ferroptosis-Related Gene	MIR6852
Ferroptosis-Related Gene	ACVR1B
Ferroptosis-Related Gene	TGFBR1
Ferroptosis-Related Gene	EPAS1
Ferroptosis-Related Gene	HILPDA
Ferroptosis-Related Gene	IFNG
Ferroptosis-Related Gene	ANO6
Ferroptosis-Related Gene	LPIN1
Ferroptosis-Related Gene	HMGB1
Ferroptosis-Related Gene	TNFAIP3
Ferroptosis-Related Gene	TLR4
Ferroptosis-Related Gene	ATF3
Ferroptosis-Related Gene	ATM
Ferroptosis-Related Gene	YY1AP1
Ferroptosis-Related Gene	EGLN2
Ferroptosis-Related Gene	MIOX
Ferroptosis-Related Gene	TAZ
Ferroptosis-Related Gene	MTDH
Ferroptosis-Related Gene	IDH1
Ferroptosis-Related Gene	SIRT1
Ferroptosis-Related Gene	FBXW7
Ferroptosis-Related Gene	PANX1
Ferroptosis-Related Gene	DNAJB6
Ferroptosis-Related Gene	BACH1
Ferroptosis-Related Gene	LONP1
Ferroptosis-Related Gene	PTGS2
Ferroptosis-Related Gene	DUSP1
Ferroptosis-Related Gene	NOS2
Ferroptosis-Related Gene	NCF2
Ferroptosis-Related Gene	MT3
Ferroptosis-Related Gene	UBC
Ferroptosis-Related Gene	ALB
Ferroptosis-Related Gene	TXNRD1
Ferroptosis-Related Gene	SRXN1
Ferroptosis-Related Gene	GPX2
Ferroptosis-Related Gene	BNIP3
Ferroptosis-Related Gene	OXSR1
Ferroptosis-Related Gene	SELENOS
Ferroptosis-Related Gene	ANGPTL7
Ferroptosis-Related Gene	DDIT4
Ferroptosis-Related Gene	LOC284561
Ferroptosis-Related Gene	ASNS
Ferroptosis-Related Gene	TSC22D3
Ferroptosis-Related Gene	DDIT3
Ferroptosis-Related Gene	JDP2
Ferroptosis-Related Gene	SLC1A4
Ferroptosis-Related Gene	PCK2
Ferroptosis-Related Gene	TXNIP
Ferroptosis-Related Gene	VLDLR
Ferroptosis-Related Gene	GPT2
Ferroptosis-Related Gene	PSAT1
Ferroptosis-Related Gene	LURAP1L
Ferroptosis-Related Gene	SLC7A5
Ferroptosis-Related Gene	HERPUD1
Ferroptosis-Related Gene	XBP1
Ferroptosis-Related Gene	ZNF419
Ferroptosis-Related Gene	KLHL24
Ferroptosis-Related Gene	TRIB3
Ferroptosis-Related Gene	ZFP69B
Ferroptosis-Related Gene	ATP6V1G2
Ferroptosis-Related Gene	VEGFA
Ferroptosis-Related Gene	GDF15
Ferroptosis-Related Gene	TUBE1
Ferroptosis-Related Gene	ARRDC3
Ferroptosis-Related Gene	CEBPG
Ferroptosis-Related Gene	SNORA16A
Ferroptosis-Related Gene	RGS4
Ferroptosis-Related Gene	BLOC1S5-TXNDC5
Ferroptosis-Related Gene	LOC390705
Ferroptosis-Related Gene	EIF2S1
Ferroptosis-Related Gene	KIM-1
Ferroptosis-Related Gene	IL6
Ferroptosis-Related Gene	CXCL2
Ferroptosis-Related Gene	RELA
Ferroptosis-Related Gene	HSD17B11
Ferroptosis-Related Gene	AGPAT3
Ferroptosis-Related Gene	SETD1B
Ferroptosis-Related Gene	FTL
Ferroptosis-Related Gene	MAFG
Ferroptosis-Related Gene	IL33
Ferroptosis-Related Gene	HAMP
Ferroptosis-Related Gene	STEAP3
Ferroptosis-Related Gene	DRD5
Ferroptosis-Related Gene	DRD4
Ferroptosis-Related Gene	MAP3K5
Ferroptosis-Related Gene	SLC2A1
Ferroptosis-Related Gene	SLC2A3
Ferroptosis-Related Gene	SLC2A6
Ferroptosis-Related Gene	SLC2A8
Ferroptosis-Related Gene	SLC2A12
Ferroptosis-Related Gene	GLUT13
Ferroptosis-Related Gene	SLC2A14
Ferroptosis-Related Gene	EIF2AK4
Ferroptosis-Related Gene	TFAP2C
Ferroptosis-Related Gene	SP1
Ferroptosis-Related Gene	HBA1
Ferroptosis-Related Gene	NNMT
Ferroptosis-Related Gene	PLIN4
Ferroptosis-Related Gene	HIC1
Ferroptosis-Related Gene	STMN1
Ferroptosis-Related Gene	RRM2
Ferroptosis-Related Gene	CAPG
Ferroptosis-Related Gene	HNF4A
Ferroptosis-Related Gene	NGB
Ferroptosis-Related Gene	YWHAE
Ferroptosis-Related Gene	GABPB1
Ferroptosis-Related Gene	AURKA
Ferroptosis-Related Gene	MIR4715
Ferroptosis-Related Gene	RIPK1
Ferroptosis-Related Gene	PRDX1
Ferroptosis-Related Gene	MIR30B
